# Supplementary material
Source: PubMed Central journal article supplement (PMC11090929)

Table S1. Patient Information. See Figure 1

| Patient ID         | Age       | Race             | Diagnosis  | # of sections analysed |
|--------------------|-----------|------------------|------------|------------------------|
| 494                | 64        | Caucasian        | Normal     | 100                    |
| 506                | 62        | Caucasian        | Normal     | 162                    |
| 520                | 35        | Caucasian        | Normal     | 51                     |
| 552                | 42        | Caucasian        | Normal     | 286                    |
| 581                | 43        | African-American | Normal     | 290                    |
| 586                | 32        | African-American | Normal     | 128                    |
| 677                | 40        | Caucasian        | Normal     | 128                    |
| 272                | 47        | African-American | TNBC       | 88                     |
| 275                | 28        | Caucasian        | TNBC       | 222                    |
| 287                | 56        | African-American | TNBC       | 66                     |
| 297                | 56        | African-American | TNBC       | 55                     |
| 323                | 43        | Caucasian        | TNBC       | 24                     |
| 396                | 40        | African-American | TNBC       | 26                     |
| 435                | 58        | Caucasian        | ER+        | 330                    |
| 461                | 50        | Caucasian        | ER+        | 87                     |
| 486                | 30        | Caucasian        | ER+        | 41                     |
| 502                | 62        | Caucasian        | ER+        | 50                     |
| 549                | 54        | Caucasian        | ER+        | 23                     |
| 612                | 68        | Caucasian        | ER+        | 36                     |
| 628                | 44        | Caucasian        | ER+        | 26                     |
| 658                | 49        | Caucasian        | ER+        | 41                     |
| 674                | 40        | Caucasian        | ER+        | 49                     |
| 679                | 52        | Caucasian        | ER+        | 23                     |
| 687                | 45        | Caucasian        | ER+        | 125                    |
| 707                | 52        | African-American | ER+        | 29                     |
| 711                | 35        | Caucasian        | ER+        | 46                     |
| <b>Median age:</b> | <b>47</b> |                  | <b>SUM</b> | <b>2532</b>            |

Table S2. Bin distribution of starting tissue sections. See Figure 1 and Table 1

| Patient ID    | Condition | # of Sec. In Bin 1 | # of Sec. In Bin 2 | # of Sec. In Bin 3 | # of Sec. In Bin 4 | Sum         |
|---------------|-----------|--------------------|--------------------|--------------------|--------------------|-------------|
| 272           | ST        | 92                 | 7                  | 1                  | 0                  | 100         |
| 275           | ST        | 66                 | 31                 | 36                 | 29                 | 162         |
| 287           | ST        | 48                 | 0                  | 0                  | 3                  | 51          |
| 297           | ST        | 247                | 21                 | 9                  | 9                  | 286         |
| 323           | ST        | 152                | 52                 | 55                 | 31                 | 290         |
| 396           | ST        | 109                | 10                 | 7                  | 2                  | 128         |
| 435           | ST        | 12                 | 13                 | 38                 | 65                 | 128         |
| 461           | ST        | 4                  | 0                  | 7                  | 77                 | 88          |
| 486           | ST        | 4                  | 1                  | 11                 | 206                | 222         |
| 494           | ST        | 14                 | 26                 | 16                 | 10                 | 66          |
| 502           | ST        | 16                 | 8                  | 9                  | 22                 | 55          |
| 506           | ST        | 18                 | 3                  | 2                  | 1                  | 24          |
| 520           | ST        | 8                  | 7                  | 6                  | 5                  | 26          |
| 549           | ST        | 50                 | 55                 | 63                 | 162                | 330         |
| 552           | ST        | 6                  | 15                 | 26                 | 40                 | 87          |
| 581           | ST        | 14                 | 13                 | 7                  | 7                  | 41          |
| 586           | ST        | 17                 | 16                 | 17                 | 0                  | 50          |
| 612           | ST        | 3                  | 1                  | 14                 | 5                  | 23          |
| 628           | ST        | 0                  | 1                  | 2                  | 33                 | 36          |
| 656           | ST        | 5                  | 2                  | 13                 | 6                  | 26          |
| 674           | ST        | 9                  | 6                  | 5                  | 21                 | 41          |
| 677           | ST        | 9                  | 6                  | 11                 | 23                 | 49          |
| 679           | ST        | 0                  | 1                  | 5                  | 17                 | 23          |
| 687           | ST        | 16                 | 9                  | 9                  | 91                 | 125         |
| 707           | ST        | 8                  | 3                  | 6                  | 12                 | 29          |
| 711           | ST        | 0                  | 1                  | 7                  | 38                 | 46          |
| <b>Normal</b> |           | <b>86</b>          | <b>86</b>          | <b>85</b>          | <b>86</b>          | <b>343</b>  |
| <b>ER+</b>    |           | <b>127</b>         | <b>101</b>         | <b>189</b>         | <b>755</b>         | <b>1172</b> |
| <b>TNBC</b>   |           | <b>714</b>         | <b>121</b>         | <b>108</b>         | <b>74</b>          | <b>1017</b> |
|               |           |                    |                    |                    | <b>SUM</b>         | <b>2532</b> |

Table S3. Bin distribution of organoid sections. See Figures 4, 5, 6 and Table 3

| Patient ID | Condition   | # of Sec. In Bin 1 | # of Sec. In Bin 2 | # of Sec. In Bin 3 | # of Sec. In Bin 4 | Sum |
|------------|-------------|--------------------|--------------------|--------------------|--------------------|-----|
| 272        | A7          | 174                | 6                  | 2                  | 4                  | 186 |
| 275        | A7          | 204                | 10                 | 4                  | 4                  | 222 |
| 287        | A7          | 115                | 4                  | 0                  | 2                  | 121 |
| 297        | A7          | 67                 | 4                  | 10                 | 15                 | 96  |
| 323        | A7          | 97                 | 13                 | 19                 | 51                 | 180 |
| 396        | A7          | 121                | 1                  | 2                  | 0                  | 124 |
| 435        | A7          | 18                 | 23                 | 13                 | 8                  | 62  |
| 461        | A7          | 28                 | 11                 | 28                 | 29                 | 96  |
| 486        | A7          | 14                 | 24                 | 31                 | 53                 | 122 |
| 494        | A7          | 28                 | 11                 | 21                 | 23                 | 83  |
| 502        | A7          | 46                 | 3                  | 10                 | 2                  | 61  |
| 520        | A7          | 96                 | 36                 | 37                 | 9                  | 178 |
| 549        | A7          | 84                 | 21                 | 33                 | 25                 | 163 |
| 552        | A7          | 69                 | 33                 | 35                 | 13                 | 150 |
| 581        | A7          | 12                 | 2                  | 3                  | 0                  | 17  |
| 586        | A7          | 17                 | 7                  | 4                  | 14                 | 42  |
| 612        | A7          | 4                  | 2                  | 3                  | 5                  | 14  |
| 687        | A7          | 3                  | 2                  | 12                 | 23                 | 40  |
| 494        | Base        | 4                  | 3                  | 8                  | 17                 | 32  |
| 502        | Base        | 8                  | 1                  | 5                  | 5                  | 19  |
| 520        | Base        | 14                 | 14                 | 7                  | 0                  | 35  |
| 552        | Base        | 18                 | 20                 | 14                 | 5                  | 57  |
| 581        | Base        | 13                 | 9                  | 4                  | 2                  | 28  |
| 586        | Base        | 9                  | 1                  | 9                  | 11                 | 30  |
| 494        | E7          | 7                  | 7                  | 10                 | 12                 | 36  |
| 581        | E7          | 23                 | 1                  | 2                  | 0                  | 26  |
| 586        | E7          | 24                 | 0                  | 0                  | 1                  | 25  |
| 581        | CXCL5       | 7                  | 5                  | 3                  | 1                  | 16  |
| 586        | CXCL5       | 7                  | 0                  | 1                  | 0                  | 8   |
| 494        | CXCL1       | 7                  | 9                  | 6                  | 7                  | 29  |
| 520        | CXCL1       | 6                  | 8                  | 8                  | 3                  | 25  |
| 552        | CXCL1       | 7                  | 11                 | 11                 | 7                  | 36  |
| 581        | CXCL1       | 3                  | 0                  | 7                  | 2                  | 12  |
| 502        | R-s         | 6                  | 2                  | 4                  | 1                  | 13  |
| 520        | R-s         | 13                 | 0                  | 0                  | 0                  | 13  |
| 552        | R-s         | 36                 | 7                  | 4                  | 2                  | 49  |
| 549        | Fulvestrant | 41                 | 1                  | 9                  | 4                  | 55  |
| 687        | Fulvestrant | 10                 | 8                  | 12                 | 15                 | 45  |
| 581        | Leptin      | 5                  | 3                  | 5                  | 0                  | 13  |
| 586        | Leptin      | 5                  | 1                  | 2                  | 1                  | 9   |
| 549        | 4-OHT       | 28                 | 10                 | 8                  | 17                 | 63  |
| 461        | 4-OHT       | 30                 | 6                  | 17                 | 13                 | 66  |
| 687        | 4-OHT       | 1                  | 1                  | 3                  | 8                  | 13  |
| 272        | PAC 1       | 66                 | 16                 | 21                 | 12                 | 115 |

|     |             |     |    |    |    |     |
|-----|-------------|-----|----|----|----|-----|
| 396 | PAC 1       | 166 | 1  | 0  | 0  | 167 |
| 396 | PAC 5       | 124 | 12 | 12 | 8  | 156 |
| 549 | Palbociclib | 15  | 7  | 29 | 44 | 95  |
| 687 | Palbociclib | 1   | 1  | 3  | 12 | 17  |



Table S4. Individual JSD scores for comparisons between starting tissues of each ER+ patient (ST\_ER\_Pat1) and each TNBC patient (ST\_TNBC\_Pat2).

| ST_ER_Pat1 | ST_TNBC_Pat2 | JSD  | JSD_Norm |
|------------|--------------|------|----------|
| 435        | 272          | 0.65 | -16.56   |
| 435        | 275          | 0.31 | 44.06    |
| 435        | 287          | 0.65 | -15.46   |
| 435        | 297          | 0.59 | -5.95    |
| 435        | 323          | 0.41 | 27.24    |
| 435        | 396          | 0.60 | -6.70    |
| 461        | 272          | 0.76 | -36.41   |
| 461        | 275          | 0.53 | 5.70     |
| 461        | 287          | 0.70 | -25.51   |
| 461        | 297          | 0.71 | -27.59   |
| 461        | 323          | 0.61 | -9.54    |
| 461        | 396          | 0.72 | -28.96   |
| 486        | 272          | 0.78 | -39.79   |
| 486        | 275          | 0.58 | -3.44    |
| 486        | 287          | 0.73 | -30.88   |
| 486        | 297          | 0.74 | -31.80   |
| 486        | 323          | 0.66 | -17.51   |
| 486        | 396          | 0.75 | -34.64   |
| 502        | 272          | 0.49 | 13.04    |
| 502        | 275          | 0.12 | 78.69    |
| 502        | 287          | 0.49 | 12.24    |
| 502        | 297          | 0.42 | 25.18    |
| 502        | 323          | 0.22 | 59.94    |
| 502        | 396          | 0.42 | 24.36    |
| 549        | 272          | 0.60 | -7.49    |
| 549        | 275          | 0.26 | 53.54    |
| 549        | 287          | 0.60 | -7.47    |
| 549        | 297          | 0.54 | 3.50     |
| 549        | 323          | 0.35 | 36.73    |
| 549        | 396          | 0.55 | 1.80     |
| 612        | 272          | 0.65 | -15.25   |
| 612        | 275          | 0.34 | 39.11    |
| 612        | 287          | 0.66 | -17.96   |
| 612        | 297          | 0.59 | -5.85    |
| 612        | 323          | 0.40 | 29.38    |
| 612        | 396          | 0.58 | -3.65    |
| 628        | 272          | 0.80 | -42.19   |
| 628        | 275          | 0.57 | -1.23    |
| 628        | 287          | 0.76 | -36.42   |
| 628        | 297          | 0.75 | -33.80   |
| 628        | 323          | 0.65 | -15.28   |
| 628        | 396          | 0.76 | -36.37   |

|     |                 |             |              |
|-----|-----------------|-------------|--------------|
| 658 | 272             | 0.58        | -2.75        |
| 658 | 275             | 0.26        | 52.96        |
| 658 | 287             | 0.62        | -11.35       |
| 658 | 297             | 0.52        | 6.69         |
| 658 | 323             | 0.29        | 48.22        |
| 658 | 396             | 0.51        | 8.39         |
| 674 | 272             | 0.56        | 0.67         |
| 674 | 275             | 0.19        | 66.00        |
| 674 | 287             | 0.58        | -2.89        |
| 674 | 297             | 0.49        | 11.95        |
| 674 | 323             | 0.27        | 51.11        |
| 674 | 396             | 0.50        | 10.40        |
| 679 | 272             | 0.80        | -42.21       |
| 679 | 275             | 0.52        | 6.89         |
| 679 | 287             | 0.77        | -37.12       |
| 679 | 297             | 0.75        | -33.08       |
| 679 | 323             | 0.61        | -8.30        |
| 679 | 396             | 0.75        | -33.95       |
| 687 | 272             | 0.65        | -16.31       |
| 687 | 275             | 0.37        | 33.36        |
| 687 | 287             | 0.63        | -12.35       |
| 687 | 297             | 0.60        | -6.25        |
| 687 | 323             | 0.46        | 17.38        |
| 687 | 396             | 0.61        | -8.80        |
| 707 | 272             | 0.54        | 3.76         |
| 707 | 275             | 0.20        | 64.63        |
| 707 | 287             | 0.53        | 5.41         |
| 707 | 297             | 0.47        | 15.37        |
| 707 | 323             | 0.30        | 46.30        |
| 707 | 396             | 0.48        | 14.22        |
| 711 | 272             | 0.80        | -43.62       |
| 711 | 275             | 0.54        | 3.26         |
| 711 | 287             | 0.77        | -36.92       |
| 711 | 297             | 0.75        | -34.68       |
| 711 | 323             | 0.63        | -11.91       |
| 711 | 396             | 0.76        | -35.53       |
|     | <b>Average:</b> | <b>0.56</b> | <b>-0.13</b> |

Table S5. Individual JSD scores for comparisons between each starting normal breast tissue samples (ST\_N\_Pat1) and (ST\_N\_Pat2).

| ST_N_Pat1 | ST_N_Pat2       | JSD         | JSD_Norm     |
|-----------|-----------------|-------------|--------------|
| 494       | 506             | 0.39        | 29.63        |
| 494       | 515             | 0.59        | -5.27        |
| 494       | 520             | 0.16        | 71.20        |
| 494       | 552             | 0.30        | 47.27        |
| 494       | 581             | 0.20        | 64.28        |
| 494       | 586             | 0.18        | 67.82        |
| 494       | 669             | 0.37        | 33.30        |
| 494       | 677             | 0.30        | 45.72        |
| 506       | 515             | 0.75        | -33.15       |
| 506       | 520             | 0.34        | 39.27        |
| 506       | 552             | 0.57        | -1.09        |
| 506       | 581             | 0.26        | 54.54        |
| 506       | 586             | 0.27        | 51.38        |
| 506       | 669             | 0.54        | 3.10         |
| 506       | 677             | 0.50        | 10.07        |
| 520       | 552             | 0.26        | 52.87        |
| 520       | 581             | 0.10        | 82.48        |
| 520       | 586             | 0.24        | 57.36        |
| 520       | 669             | 0.28        | 49.92        |
| 520       | 677             | 0.22        | 61.12        |
| 552       | 581             | 0.35        | 36.79        |
| 552       | 586             | 0.43        | 23.39        |
| 552       | 669             | 0.16        | 72.22        |
| 552       | 677             | 0.14        | 75.85        |
| 581       | 586             | 0.21        | 62.20        |
| 581       | 669             | 0.35        | 36.99        |
| 581       | 677             | 0.30        | 45.88        |
| 586       | 669             | 0.47        | 15.41        |
| 586       | 677             | 0.41        | 27.34        |
|           | <b>Average:</b> | <b>0.33</b> | <b>40.62</b> |

Table S6. Individual JSD scores for comparisons between each starting ER+ breast cancer tissue samples (ST\_ER\_Pat1) and (ST\_ER\_Pat2).

| ST_ER_Pat1 | ST_ER_Pat2 | JSD  | JSD_Norm |
|------------|------------|------|----------|
| 435        | 461        | 0.30 | 45.96    |
| 435        | 486        | 0.37 | 33.93    |
| 435        | 502        | 0.20 | 63.51    |
| 435        | 549        | 0.09 | 83.35    |
| 435        | 612        | 0.28 | 50.81    |
| 435        | 628        | 0.34 | 38.92    |
| 435        | 656        | 0.31 | 44.72    |
| 435        | 674        | 0.17 | 69.14    |
| 435        | 679        | 0.26 | 54.52    |
| 435        | 687        | 0.18 | 68.36    |
| 435        | 707        | 0.15 | 74.18    |
| 435        | 711        | 0.28 | 49.56    |
| 461        | 486        | 0.15 | 72.59    |
| 461        | 502        | 0.43 | 23.06    |
| 461        | 549        | 0.33 | 40.99    |
| 461        | 612        | 0.51 | 8.45     |
| 461        | 628        | 0.20 | 64.25    |
| 461        | 656        | 0.58 | -2.69    |
| 461        | 674        | 0.43 | 23.33    |
| 461        | 679        | 0.20 | 64.08    |
| 461        | 687        | 0.22 | 60.73    |
| 461        | 707        | 0.36 | 36.35    |
| 461        | 711        | 0.17 | 69.40    |
| 486        | 502        | 0.49 | 12.15    |
| 486        | 549        | 0.38 | 32.25    |
| 486        | 612        | 0.60 | -6.43    |
| 486        | 628        | 0.12 | 79.01    |
| 486        | 656        | 0.64 | -14.48   |
| 486        | 674        | 0.48 | 14.88    |
| 486        | 679        | 0.24 | 57.93    |
| 486        | 687        | 0.24 | 56.92    |
| 486        | 707        | 0.42 | 25.14    |
| 486        | 711        | 0.21 | 62.30    |
| 502        | 549        | 0.16 | 71.43    |
| 502        | 612        | 0.29 | 47.92    |
| 502        | 628        | 0.48 | 14.43    |
| 502        | 656        | 0.26 | 53.42    |
| 502        | 674        | 0.13 | 77.00    |
| 502        | 679        | 0.42 | 24.62    |
| 502        | 687        | 0.28 | 50.46    |
| 502        | 707        | 0.08 | 85.08    |
| 502        | 711        | 0.44 | 20.97    |

|     |                 |             |              |
|-----|-----------------|-------------|--------------|
| 549 | 612             | 0.32        | 42.18        |
| 549 | 628             | 0.36        | 36.45        |
| 549 | 656             | 0.31        | 43.90        |
| 549 | 674             | 0.11        | 79.99        |
| 549 | 679             | 0.31        | 45.11        |
| 549 | 687             | 0.15        | 72.56        |
| 549 | 707             | 0.10        | 81.63        |
| 549 | 711             | 0.33        | 40.65        |
| 612 | 549             | 0.32        | 42.18        |
| 612 | 628             | 0.57        | -1.48        |
| 612 | 656             | 0.17        | 69.91        |
| 612 | 674             | 0.30        | 46.56        |
| 612 | 679             | 0.45        | 20.40        |
| 612 | 687             | 0.44        | 22.05        |
| 612 | 707             | 0.31        | 45.03        |
| 612 | 711             | 0.47        | 15.66        |
| 628 | 656             | 0.61        | -8.61        |
| 628 | 674             | 0.45        | 19.81        |
| 628 | 679             | 0.17        | 69.60        |
| 628 | 687             | 0.24        | 57.37        |
| 628 | 707             | 0.41        | 26.93        |
| 628 | 711             | 0.16        | 71.28        |
| 658 | 376             | 0.64        | -14.18       |
| 658 | 674             | 0.24        | 57.50        |
| 658 | 679             | 0.51        | 8.31         |
| 658 | 687             | 0.45        | 19.15        |
| 658 | 707             | 0.31        | 45.24        |
| 658 | 711             | 0.54        | 2.90         |
| 674 | 679             | 0.40        | 29.14        |
| 674 | 687             | 0.26        | 54.02        |
| 674 | 707             | 0.14        | 75.32        |
| 674 | 711             | 0.43        | 24.19        |
| 679 | 687             | 0.25        | 55.69        |
| 679 | 707             | 0.36        | 36.62        |
| 679 | 711             | 0.05        | 91.45        |
| 687 | 707             | 0.20        | 64.03        |
| 687 | 711             | 0.26        | 53.81        |
| 707 | 711             | 0.37        | 33.32        |
|     | <b>Average:</b> | <b>0.32</b> | <b>43.48</b> |

Table S7. Individual JSD scores for comparisons between starting tissues of each individual ER+ patient (ST\_ER\_Pat1) and each normal breast tissue samples (ST\_N\_Pat2).

| ST_ER_Pat1 | ST_N_Pat2 | JSD  | JSD_Norm |
|------------|-----------|------|----------|
| 435        | 494       | 0.33 | 40.89    |
| 435        | 506       | 0.54 | 3.19     |
| 435        | 520       | 0.30 | 46.88    |
| 435        | 552       | 0.08 | 86.08    |
| 435        | 581       | 0.34 | 38.55    |
| 435        | 586       | 0.49 | 11.92    |
| 435        | 677       | 0.10 | 81.43    |
| 461        | 494       | 0.57 | -2.27    |
| 461        | 506       | 0.68 | -21.76   |
| 461        | 520       | 0.53 | 4.55     |
| 461        | 552       | 0.36 | 36.27    |
| 461        | 581       | 0.56 | 0.23     |
| 461        | 586       | 0.72 | -28.95   |
| 461        | 677       | 0.34 | 39.75    |
| 486        | 494       | 0.60 | -7.45    |
| 486        | 506       | 0.71 | -27.46   |
| 486        | 520       | 0.57 | -1.59    |
| 486        | 552       | 0.38 | 31.45    |
| 486        | 581       | 0.59 | -5.35    |
| 486        | 586       | 0.75 | -34.81   |
| 486        | 677       | 0.38 | 32.85    |
| 502        | 494       | 0.26 | 54.25    |
| 502        | 506       | 0.38 | 32.40    |
| 502        | 520       | 0.18 | 68.52    |
| 502        | 552       | 0.22 | 60.71    |
| 502        | 581       | 0.20 | 63.82    |
| 502        | 586       | 0.41 | 25.91    |
| 502        | 677       | 0.10 | 81.90    |
| 549        | 494       | 0.27 | 51.22    |
| 549        | 506       | 0.48 | 14.06    |
| 549        | 520       | 0.23 | 58.39    |
| 549        | 552       | 0.12 | 78.68    |
| 549        | 581       | 0.27 | 52.42    |
| 549        | 586       | 0.46 | 17.91    |
| 549        | 677       | 0.06 | 89.74    |
| 612        | 494       | 0.36 | 35.61    |
| 612        | 506       | 0.53 | 6.09     |
| 612        | 520       | 0.33 | 41.12    |
| 612        | 552       | 0.27 | 51.16    |
| 612        | 581       | 0.39 | 30.82    |
| 612        | 586       | 0.42 | 24.51    |
| 612        | 677       | 0.29 | 48.81    |

|     |     |      |        |
|-----|-----|------|--------|
| 628 | 494 | 0.59 | -5.83  |
| 628 | 506 | 0.72 | -29.23 |
| 628 | 520 | 0.57 | -1.11  |
| 628 | 552 | 0.37 | 33.92  |
| 628 | 581 | 0.59 | -4.84  |
| 628 | 586 | 0.75 | -34.09 |
| 628 | 677 | 0.38 | 32.36  |
| 658 | 494 | 0.29 | 47.76  |
| 658 | 506 | 0.46 | 18.18  |
| 658 | 520 | 0.25 | 55.81  |
| 658 | 552 | 0.24 | 57.56  |
| 658 | 581 | 0.31 | 45.21  |
| 658 | 586 | 0.37 | 33.64  |
| 658 | 677 | 0.22 | 59.97  |
| 674 | 494 | 0.30 | 46.07  |
| 674 | 506 | 0.44 | 20.85  |
| 674 | 520 | 0.24 | 56.54  |
| 674 | 552 | 0.20 | 63.77  |
| 674 | 581 | 0.26 | 52.98  |
| 674 | 586 | 0.48 | 14.86  |
| 674 | 677 | 0.10 | 82.64  |
| 679 | 494 | 0.51 | 8.87   |
| 679 | 506 | 0.69 | -23.07 |
| 679 | 520 | 0.49 | 12.82  |
| 679 | 552 | 0.25 | 54.71  |
| 679 | 581 | 0.52 | 6.50   |
| 679 | 586 | 0.66 | -18.55 |
| 679 | 677 | 0.30 | 46.74  |
| 687 | 494 | 0.44 | 21.50  |
| 687 | 506 | 0.56 | 0.39   |
| 687 | 520 | 0.39 | 29.79  |
| 687 | 552 | 0.26 | 53.58  |
| 687 | 581 | 0.41 | 26.37  |
| 687 | 586 | 0.61 | -8.17  |
| 687 | 677 | 0.20 | 64.11  |
| 707 | 494 | 0.28 | 49.58  |
| 707 | 506 | 0.40 | 28.78  |
| 707 | 520 | 0.20 | 63.94  |
| 707 | 552 | 0.21 | 63.22  |
| 707 | 581 | 0.24 | 57.30  |
| 707 | 586 | 0.43 | 23.71  |
| 707 | 677 | 0.08 | 86.10  |
| 711 | 494 | 0.55 | 0.98   |
| 711 | 506 | 0.71 | -26.49 |
| 711 | 520 | 0.53 | 5.66   |

|     |                 |             |              |
|-----|-----------------|-------------|--------------|
| 711 | 552             | 0.31        | 44.83        |
| 711 | 581             | 0.56        | 0.21         |
| 711 | 586             | 0.71        | -26.30       |
| 711 | 677             | 0.33        | 40.42        |
|     | <b>Average:</b> | <b>0.40</b> | <b>29.09</b> |



Table S8. Individual JSD scores for comparisons between starting tissues of each individual TNBC sample (ST\_TNBC\_Pat1) and (ST\_TNBC\_Pat2).

| ST_TNBC_Pat1 | ST_TNBC_Pat2    | JSD         | JSD_Norm     |
|--------------|-----------------|-------------|--------------|
| 272          | 275             | 0.40        | 28.56        |
| 272          | 287             | 0.22        | 60.78        |
| 272          | 297             | 0.11        | 81.31        |
| 272          | 323             | 0.34        | 40.21        |
| 272          | 396             | 0.11        | 80.64        |
| 275          | 287             | 0.43        | 23.35        |
| 275          | 297             | 0.33        | 41.39        |
| 275          | 323             | 0.11        | 80.66        |
| 275          | 396             | 0.33        | 40.49        |
| 287          | 297             | 0.20        | 63.90        |
| 287          | 323             | 0.40        | 28.69        |
| 287          | 396             | 0.23        | 59.23        |
| 297          | 287             | 0.20        | 63.90        |
| 297          | 323             | 0.27        | 52.53        |
| 297          | 396             | 0.07        | 87.71        |
| 323          | 396             | 0.27        | 52.37        |
|              | <b>Average:</b> | <b>0.25</b> | <b>55.36</b> |

Table S9. Individual JSD scores for comparisons between starting tissues of each individual TNBC patient (ST\_TNBC\_Pat1) and each ER+ tissue samples (ST\_ER+\_Pat2).

| ST_TNBC_Pat1 | ST_N_Pat2 | JSD  | JSD_Norm |
|--------------|-----------|------|----------|
| 272          | 494       | 0.55 | 2.07     |
| 272          | 506       | 0.20 | 64.65    |
| 272          | 520       | 0.49 | 12.48    |
| 272          | 552       | 0.69 | -22.83   |
| 272          | 581       | 0.46 | 17.33    |
| 272          | 586       | 0.46 | 17.91    |
| 272          | 677       | 0.60 | -7.23    |
| 275          | 494       | 0.19 | 66.89    |
| 275          | 506       | 0.26 | 53.23    |
| 275          | 520       | 0.08 | 85.14    |
| 275          | 552       | 0.32 | 43.08    |
| 275          | 581       | 0.11 | 81.22    |
| 275          | 586       | 0.28 | 50.12    |
| 275          | 677       | 0.24 | 56.59    |
| 287          | 494       | 0.60 | -6.47    |
| 287          | 506       | 0.28 | 50.06    |
| 287          | 520       | 0.53 | 6.21     |
| 287          | 552       | 0.69 | -23.12   |
| 287          | 581       | 0.51 | 9.58     |
| 287          | 586       | 0.57 | -1.41    |
| 287          | 677       | 0.59 | -5.63    |
| 297          | 494       | 0.48 | 13.47    |
| 297          | 506       | 0.11 | 80.40    |
| 297          | 520       | 0.42 | 25.48    |
| 297          | 552       | 0.62 | -10.96   |
| 297          | 581       | 0.39 | 30.07    |
| 297          | 586       | 0.43 | 22.79    |
| 297          | 677       | 0.53 | 5.59     |
| 323          | 494       | 0.24 | 56.87    |
| 323          | 506       | 0.17 | 68.77    |
| 323          | 520       | 0.16 | 71.29    |
| 323          | 552       | 0.41 | 27.63    |
| 323          | 581       | 0.15 | 72.66    |
| 323          | 586       | 0.26 | 53.50    |
| 323          | 677       | 0.33 | 41.48    |
| 396          | 494       | 0.47 | 15.42    |
| 396          | 506       | 0.09 | 83.23    |
| 396          | 520       | 0.41 | 27.01    |
| 396          | 552       | 0.62 | -10.32   |
| 396          | 581       | 0.39 | 31.23    |
| 396          | 586       | 0.40 | 28.81    |
| 396          | 677       | 0.53 | 5.59     |

|  |          |      |       |
|--|----------|------|-------|
|  | Average: | 0.39 | 30.71 |
|--|----------|------|-------|

Table S10 Normalized JSD scores for comparison between normal starting tissue and organoids generated from normal tissue under varying conditions. Condition\_1: starting tissue; Condition\_2: organoids culture condition.

| Condition_1 | Condition_2 | JSD  | JSD_Norm |
|-------------|-------------|------|----------|
| ST          | A7          | 0.11 | 80.36    |
| ST          | CXCL5       | 0.24 | 57.14    |
| ST          | CXCL1       | 0.15 | 73.21    |
| ST          | Leptin      | 0.15 | 73.21    |

**Supplementary Figure Legends****Supplementary Figure Legends**

**Figure S1 Representative sections stained with hematoxylin and eosin stain of patient samples used in this study.** Human breast tissue from reduction mammoplasty or breast cancer surgery was collected as waste tissue with institutional review board approval. See Figure 1

**Figure S2 The probability density distribution for TNBC starting tissue and the resulting organoids cultured under various conditions.** Base media was supplemented with AREG and FGF-7 (A/7), EGF and FGF-7 (E/7). See Figures 2, 4 and 5

**Figure S3 Analysis of supernatants obtained from normal, or cancer associated fibroblasts (CAFs).** The circles indicate analysis from normal fibroblasts and the squares from CAFs. The analysis for each factor analyzed are presented side by side. The readout for each factor was normalized to positive and negative controls. Individual points were obtained from analysis of fibroblasts obtained from different patients. See Figure 4

**Figure S4 Cumulative Z-scores calculated based on normalized counts across genes differentially expressed between TNBC ST and Normal ST.** See Figure 5

**Figure S5 A positive linear correlation was observed for the number of K8+ versus ER $\alpha$ + cells in ER+ breast cancer organoids.** Correlation r values for each patient are calculated. See Figure 6

**Figure S6 (A) Probability density distribution and (B) heat map analysis of Patient 461 tumor organoid responses to drug treatment.** See Figure 6.

Normal

TNBC

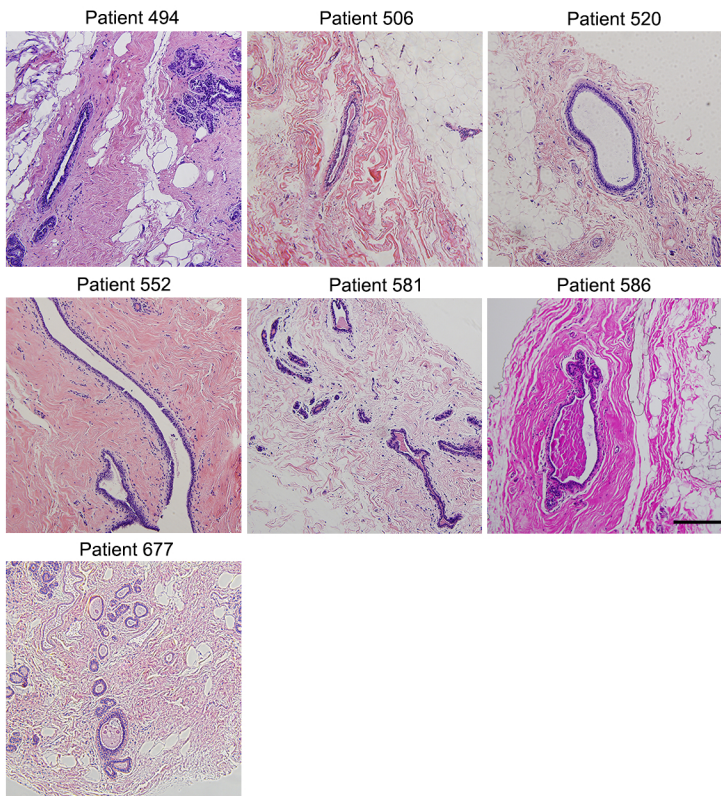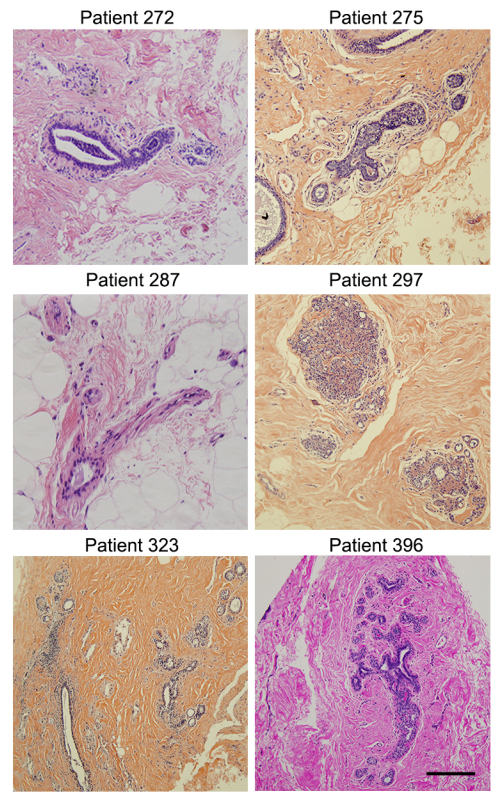

ER+

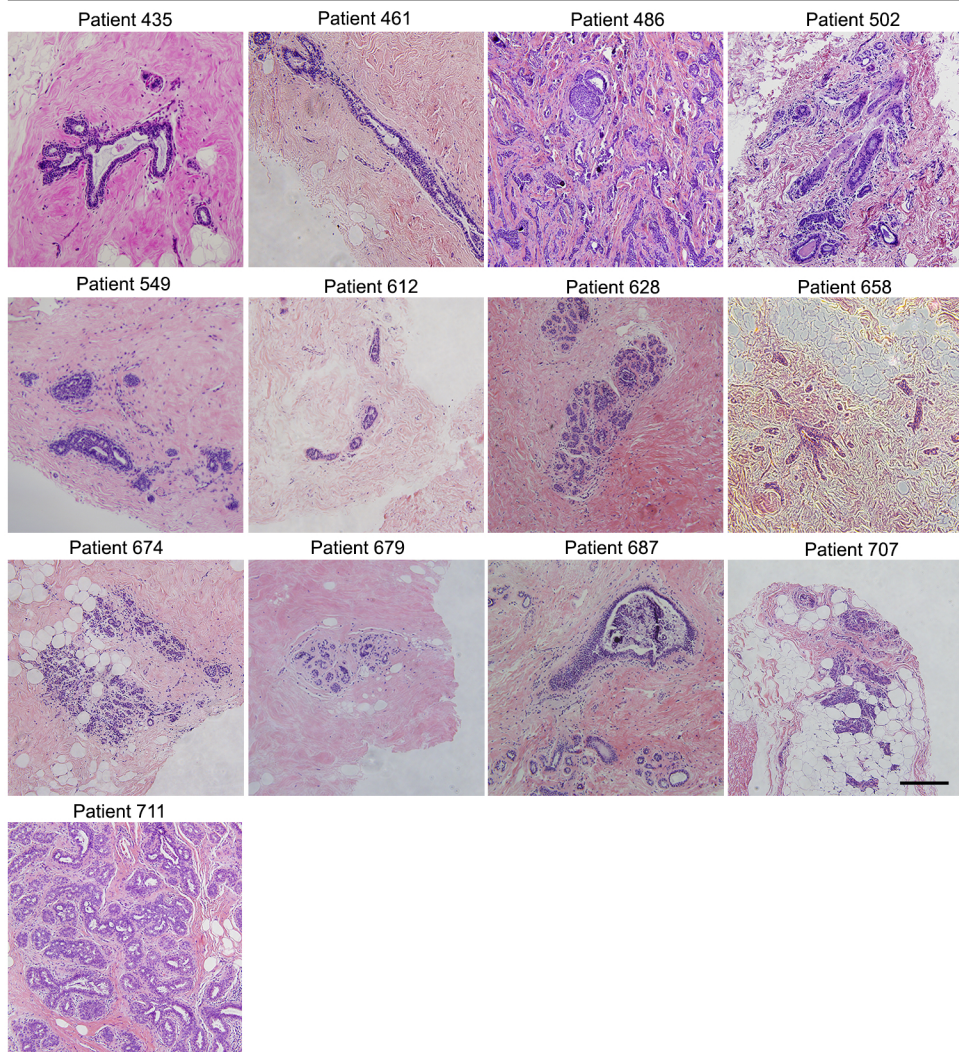

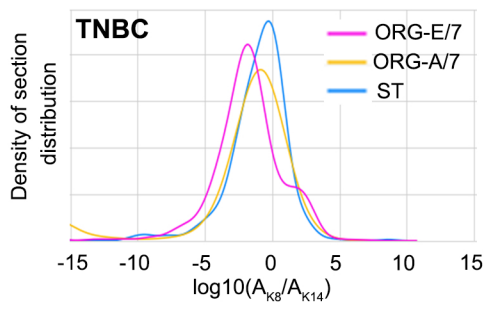



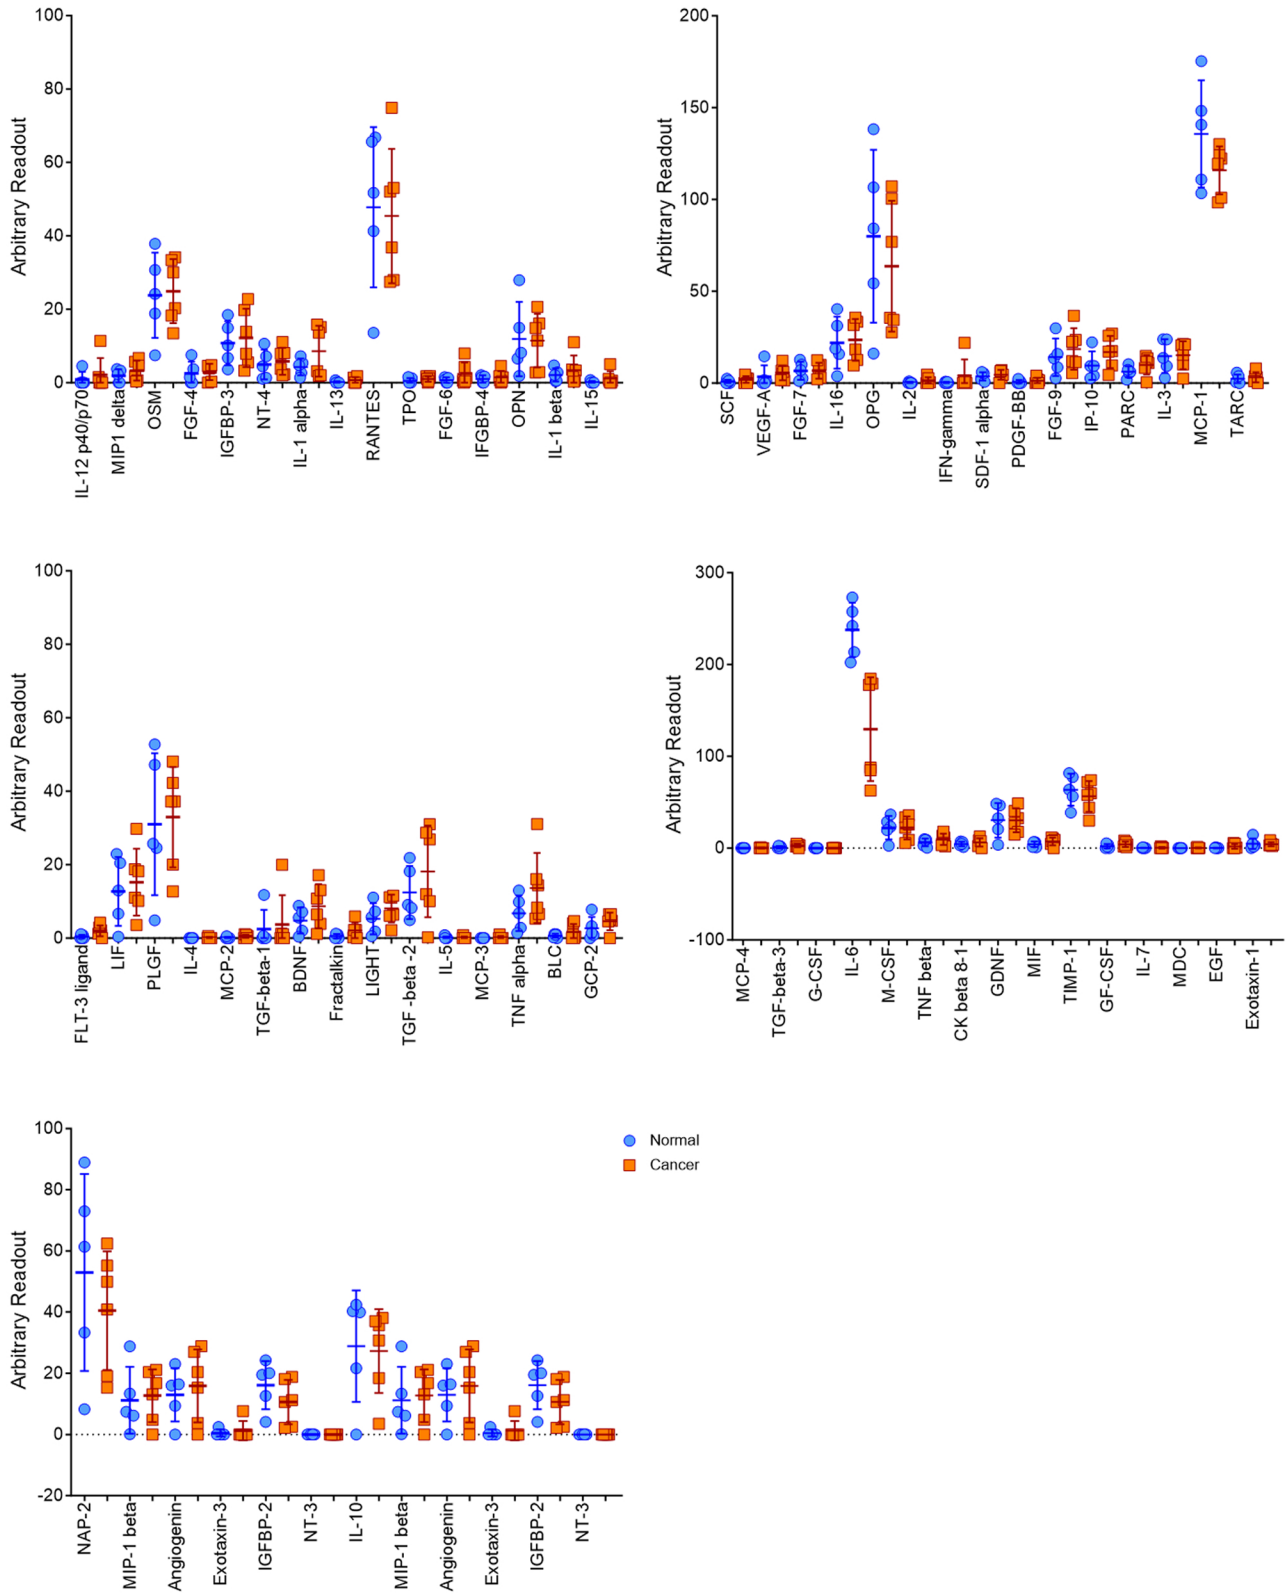



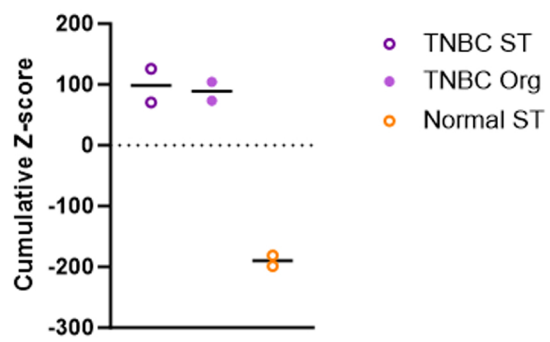

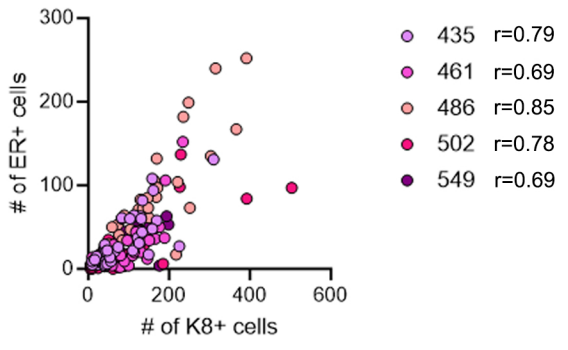

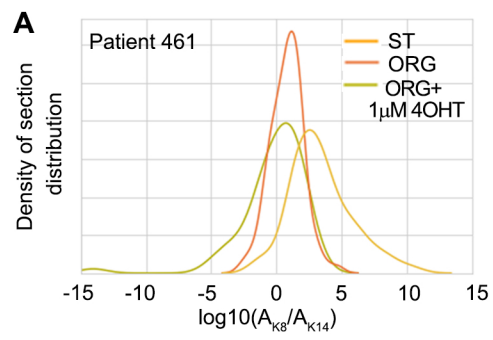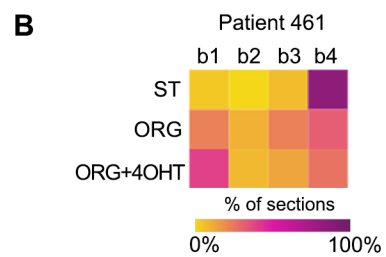

Supplement: 13402_2023_877_MOESM1_ESM.pdf [file 13402_2023_877_MOESM1_ESM.pdf]
